1 **Full Title;**

2 Association of aortic clamping time with systemic immune inflammation and systemic  
3 inflammatory response indexes in isolated coronary bypass surgery

4 **Authors;**

5 1. Duygu Durmaz; Cardiovascular specialist, Doctor, Department of Cardiothoracic and  
6 Vascular Surgery, Bandırma 17 Eylül University , Orcid Id; 0000-0001-9617-8046

7 2. Sedat Gündöner; Perfusionist, Department of Cardiothoracic and Vascular Surgery,  
8 Bandırma Education and Research Hospital, Orcid Id; 0000-0002-0513-8581

9 3. Hayrettin Tekümit; Cardiovascular specialist, Professor Doctor, Department of  
10 Cardiothoracic and Vascular Surgery, Bandırma 17 Eylül University, Orcid Id; 0000-0002-  
11 5157-3592

12 **Short Title;**

13 Aortic Clamping Time and Inflammation in CABG

14 **Corresponding Author And Contact Information:**

15 Duygu Durmaz; Bandırma 17 Eylül Üniversitesi, Yeni Mahalle Şehit Astsubay Mustafa Soner  
16 Varlık Caddesi No:77, 10250 Bandırma/Balıkesir

17 +905068936523 - [ddurmaz@bandirma.edu.tr](mailto:ddurmaz@bandirma.edu.tr)

18 **Total word count;** 1991

19

20

21

22 **Objective:** Aortic clamping time during cardiopulmonary bypass (CPB) has been associated  
23 with inflammatory processes such as systemic inflammatory response syndrome. In this study,  
24 we evaluated the association of CPB and aortic cross-clamping (ACC) times with systemic  
25 inflammatory response index (SIRI) and systemic immune inflammation index (SIII) in  
26 isolated coronary artery bypass surgery (CABG).

27 **Methods:** 96 patients who underwent isolated CABG at a single center between 2021 and  
28 2023 were retrospectively analyzed. Patients were divided into below median aortic clamp  
29 time (group I; n=56) and above median aortic clamp time (group II; n=42) according to  
30 median aortic clamp time (66.2 minutes). Demographic data, preoperative and postoperative  
31 laboratory parameters were recorded. SIRI and SIII values were calculated.

32 **Results:** Baseline demographic data were similar between the groups. The duration of CPB  
33 and aortic clamping was significantly longer in group II ( $p < 0.001$ ). SIII and SIRI values were  
34 significantly increased in both groups in the postoperative period. However, there was no  
35 correlation between increased CPB and ACC durations and SIII and SIRI. However, no  
36 significant difference was observed in postoperative SIII and SIRI values between the groups.  
37 A weak correlation was found between SIII index and postoperative albumin levels.

38 **Conclusions:** There is no significant relationship between aortic clamping time and  
39 inflammatory indices in patients undergoing isolated CABG surgery. Increasing the duration  
40 of surgery does not affect the change in SIRI and SIII values.

41 **Keywords:** Coronary artery bypass; Cardiopulmonary bypass; Systemic immune  
42 inflammation index; Systemic inflammation response index.

43

44

45

46

## 47 **1. Introduction**

48 During cardiopulmonary bypass (CPB), the patient receives constant blood flow through a  
49 mechanical pump (1). In CPB, a cross-clamp is placed over the aorta to provide an  
50 immobilized and bloodless operating field (2). Systemic inflammatory response syndrome  
51 (SIRS) is an inflammatory process that can be triggered by cardiac surgery and CPB. SIRS is  
52 associated with the release of several proinflammatory mediators after open heart surgery  
53 procedures that may affect postoperative outcomes (3).

54 The marked increase in SIRS after coronary artery bypass grafting (CABG) may be related to  
55 the duration of perioperative CPB and aortic cross clamping (ACC). Many studies have  
56 shown that the duration of CPB and ACC during cardiac surgery are predictors of mortality  
57 and morbidity. However, there is no consensus on the safe time limit. In this regard,  
58 researchers have reported different results for the safe use of CPB and ACC (4,5).

59 The concepts of systemic inflammatory response index (SIRI) and systemic immune  
60 inflammation index (SIII) have been defined as new inflammatory markers (6,7). These  
61 indices include the main components of inflammatory markers such as neutrophils,  
62 monocytes, lymphocytes and platelets and have been presented as possible mortality  
63 prognostic factors in different cardiovascular diseases (8,9).

64 In this study, we tried to determine the relationship between aortic clamping time and  
65 inflammatory indexes in isolated coronary artery bypass surgery.

## 66 **2. Methods**

### 67 **2.1 Study Design and Patients**

68 The population of this retrospective study consisted of 96 patients undergoing first-time  
69 isolated CABG at a single center between June 2021 and September 2023. Patients over 18  
70 years of age who underwent elective isolated on-pump coronary artery bypass surgery were  
71 included. Reoperations, patients with additional surgical procedures, patients with known

72 cerebrovascular disease, bleeding pathology and patients with incomplete medical data were  
73 excluded. The study groups were divided into those with a median aortic clamping time of the  
74 total population below (Group I) and above (Group II) 66.2 minutes. The study was approved  
75 by XXX University Non-Interventional Research Ethics Committee with the ethics committee  
76 decision dated 16.01.2024 and numbered 2024-1.

## 77 **2.2 Data collection and calculation of inflammatory indexes**

78 Demographic data, preoperative and postoperative hematologic and biochemical analyses, and  
79 clinical data including postoperative processes were obtained by examining the computerized  
80 patient record system. SIRI and SIII indexes related with systemic inflammation were  
81 calculated as follows (10). SIII; peripheral platelet count x neutrophil count / lymphocyte  
82 count. SIRI; neutrophil count x monocyte count / lymphocyte count

## 83 **2.3 Operative technique**

84 All patients underwent standard median sternotomy under general anesthesia. After  
85 appropriate anticoagulation with 400 IU/kg heparin, cardiopulmonary bypass (CPB) was  
86 initiated by cannulation of the ascending aorta and right atrium. All patients were monitored  
87 with moderate hypothermia (28 - 32 °C) and myocardial protection was achieved with  
88 antegrade-retrograde combined blood cardioplegia. Mean arterial pressure was maintained  
89 between 60 and 80 mmHg during CPB. After the procedure was completed, CPB was  
90 terminated after the body temperature of the patients was raised to 37 °C. Decanulation was  
91 performed after neutralization with protamine.

## 92 **2.4 Statistical analysis**

93 Statistical evaluation was performed with IBM SPSS 25.0 (SPSS Inc., Chicago, IL, USA)  
94 package program. While evaluating the study data, quantitative variables were represented by  
95 mean, standard deviation, median, min and max values, and qualitative variables were  
96 represented by descriptive statistical methods such as frequency and percentage. Shapiro

97 Wilks test and Box Plot graphs were used to evaluate the conformity of the data to normal  
98 distribution. Student's t-test was used for quantitative two-group evaluations showing normal  
99 distribution, and Mann Whitney-U test was used for those not showing normal distribution.  
100 Between two follow-ups, Paired Samples test was used for those with normal distribution and  
101 Wilcoxon test was used for those without normal distribution. Chi-Square test and Fisher  
102 Exact Test were used to compare qualitative data. Pearson correlation analysis was used to  
103 evaluate the relationships between variables. The results were evaluated at 95% confidence  
104 interval and significance was evaluated at  $p < 0.05$  level.

### 105 **3. Results**

106 A total of 96 patients who underwent isolated CABG were included in the study. The mean  
107 ages of the patients included in the study were  $63.6 \pm 8.8$  years for group I and  $66 \pm 8.9$  years for  
108 group II ( $p > 0.05$ ). 64.8% of patients in group I and 73.8% of patients in group II were male.  
109 The study groups were divided into those with a median aortic clamping time of the total  
110 population below (Group I) and above (Group II) 66.2 minutes. The mean aortic clamping  
111 times were  $51.7 \pm 10.7$  minutes for group I and  $89.9 \pm 13.0$  minutes for group II ( $p < 0.05$ ) (Table  
112 1).

113 The changes in the parameters within and between the groups at preoperative and  
114 postoperative 24th hour periods are shown in Table 2. Significant differences were found  
115 between group I and group II in SIII, SIRI, CRP and albumin values at preoperative and  
116 postoperative 24 hours. In the comparison between the groups, preoperative and postoperative  
117 SIII, SIRI and albumin values were similar. Although there was a statistical difference in  
118 preoperative CRP levels between the groups, no statistical difference was found between the  
119 CRP values in the postoperative 24th hour measurements (Table 2). The graphical changes of  
120 SIII and SIRI parameters of group I and group II are shown in figures I and II.

121 When the correlation of SIRI and SIII values with CPB and ACC duration, postoperative  
122 albumin and CRP values were analyzed, it was found that only postoperative SIII value had a  
123 weak correlation with postoperative albumin level ( $r=0.240$ ;  $p=0.019$ ) (Table 3). No  
124 statistically significant correlation was found for other postoperative variables.

#### 125 **4. Discussion**

126 To our knowledge, this is the first study to present the relationship and variation of different  
127 inflammatory indices with aortic cross-clamping time in on-pump coronary artery bypass  
128 surgery. In this retrospective study, we evaluated the relationship between aortic clamp  
129 duration and inflammatory indices in 96 patients undergoing isolated CABG surgery.  
130 Different studies have shown that some complications develop and the risk of death increases  
131 in patients exposed to prolonged aortic cross-clamping (11,12,13).

132 The systemic immune inflammatory index (SIII) is an inflammatory index that includes three  
133 differently shaped elements involved in the immune response, including neutrophils,  
134 lymphocytes and platelets. This index has been reported to be a prognostic marker used to  
135 determine long-term prognosis in coronary revascularization (14). Researchers have also  
136 described this index as an important marker reflecting the inflammatory status in various  
137 clinical pictures including appendicitis, coronary artery disease and neoplasms (15,16,17).

138 Systemic inflammatory response describes the pathophysiologic response of the immune  
139 system to events such as infection, trauma, burns and various other injuries (18). Many factors  
140 associated with the contact of blood with extracorporeal artificial circuits in cardiac surgery  
141 contribute to SIRS formation (19). The systemic inflammatory response index (SIRI) is  
142 defined as an inflammatory index describing immunologic defenses involving neutrophils,  
143 monocytes and lymphocytes (20).

144 Although CPB is considered a safe method to facilitate cardiac surgery, prolonged CPB is  
145 associated with complications (21). Exposure of blood to abnormal shear stress and contact

146 with the artificial surface of the bypass circuit leads to pro-inflammatory activation of the  
147 coagulation and complement systems, endothelial cell death and platelet activation (22,23,24).  
148 In addition, prolonged aortic cross-clamping time is known to be associated with decreased  
149 early survival after cardiac surgery (25). It is not known how the inflammatory indexes SIII  
150 and SIRI, which have emerged as a prognostic factor for cardiovascular diseases, change  
151 depending on the duration of CPB and aortic cross-clamping. In our study, we tried to  
152 determine the effect of different aortic cross-clamping times on these indexes in patients  
153 undergoing isolated on-pump CABG.

154 We divided the included patients into two groups according to the median aortic cross-clamp  
155 time (66.2 min) of patients undergoing isolated CABG. The aortic cross-clamp time was  
156  $51.7 \pm 10.7$  and  $89.9 \pm 13.0$  min in group I and group II, respectively. Baseline demographic  
157 characteristics of the patients were similar. Mean CPB duration was  $103.8 \pm 20$  and  $134.4 \pm 21.3$   
158 min in group I and group II, respectively. Preoperative SIII and SIRI values were similar in  
159 both groups. In the postoperative period, there was an increase in these indices within the  
160 groups. We think that this is related to the increase in the inflammatory response to CPB.  
161 However, postoperative SIII and SIRI indices were similar between the groups. This suggests  
162 that the relatively long aortic clamping time did not affect the inflammatory indices. Robic M  
163 et al. reported that a longer duration of CPB was associated with increased blood neutrophil  
164 count (26). In our study, it was determined that the SIII value including the neutrophil  
165 parameter was not related with duration.

166 C-Reactive Protein (CRP) increases significantly in response to inflammation. CRP levels  
167 increase significantly after cardiac surgery with CPB (27). In our study, although  
168 postoperative CRP values increased statistically significantly in both groups compared to  
169 preoperative values, postoperative measurements were similar between the groups. In cardiac  
170 surgery with CPB, serum albumin levels decrease with the effect of hemodilution (28). At the

171 same time, high inflammation parameters have been independently associated with  
172 hypoalbuminemia (29). In our study, a significant decrease in postoperative serum albumin  
173 levels was observed in both groups and postoperative serum albumin levels were similar  
174 between the groups.

175 There was no correlation between postoperative SIII and SIRI indices and CPB duration,  
176 aortic clamping duration and CRP levels. However, a weak statistically significant correlation  
177 was found between postoperative SIII index and postoperative albumin levels ( $r=0.252$ ;  
178  $p=0.018$ ).

179 Our study is the first to evaluate the relationship between inflammatory indices and operative  
180 times in patients undergoing isolated CABG surgery. However, there are some limitations.  
181 First of all, our study has a non-randomized design because it is retrospective. This creates the  
182 possibility of limiting the population included. In addition, the fact that it is a single-center  
183 study also limits the sample size. We believe that the relationship between CPB and  
184 inflammatory indices should be investigated in detail with a larger sample group.

#### 185 **Conflict of interest**

186 None

#### 187 **Funding**

188 None

#### 189 **Acknowledgements**

190 None

#### 191 **References**



- 192 1) Sarkar M, Prabhu V. Basics of cardiopulmonary bypass. *Indian J Anaesth.* 2017  
193 Sep;61(9):760-767. doi: 10.4103/ija.IJA\_379\_17. PMID: 28970635; PMCID:  
194 PMC5613602.
- 195 2) Machin D, Allsager C. Principles of cardiopulmonary bypass. *Contin Educ Anaesth Crit*  
196 *Care Pain.* 2006;6(5):176–181. doi: 10.1093/bjaceaccp/mkl043.
- 197 3) Gümüş F, Erkalp K, Kayalar N, Alagöl A. Yaşlı hasta popülasyonunda kalp cerrahisi ve  
198 anestezi yaklaşımı. *Türk Göğüs Kalp Damar Dergisi.* 2013; 21 (1):250–255.
- 199 4) Verheijen LP, van Zaane B, van Aarnhem EE, Peelen LM, van Klei WA. The association  
200 between aortic cross clamp time and postoperative morbidity and mortality in mitral valve  
201 repair: a retrospective cohort study. *J Cardiovasc Surg (Torino).* 2018 Jun;59(3):453-461.  
202 doi: 10.23736/S0021-9509.18.10123-6. Epub 2018 Feb 8. PMID: 29430884.
- 203 5) Mehmood A, Nadeem RN, Kabbani MS, Khan AH, Hijazi O, Ismail SR, Shath G, Eng  
204 WW, Jawed S. Impact of Cardiopulmonary Bypass and Aorta Cross Clamp Time on the  
205 Length of Mechanical Ventilation after Cardiac Surgery among Children: A Saudi  
206 Arabian Experience. *Cureus.* 2019 Aug 7;11(8):e5333. doi: 10.7759/cureus.5333. PMID:  
207 31598440; PMCID: PMC6778048.
- 208 6) Parmana IMA, Boom CE, Poernomo H, Gani C, Nugroho B, Cintyandy R, Sanjaya L,  
209 Hadinata Y, Parna DR, Hanafy DA. Systemic Immune-Inflammation Index Predicts  
210 Prolonged Mechanical Ventilation and Intensive Care Unit Stay After off-Pump Coronary  
211 Artery Bypass Graft Surgery: A Single-Center Retrospective Study. *Vasc Health Risk*  
212 *Manag.* 2023;19:353-361  
213 <https://doi.org/10.2147/VHRM.S409678>
- 214 7) Urbanowicz T, Michalak M, Olasińska-Wisniewska A, Rodzki M, Witkowska A, Gąsecka  
215 A, Buczkowski P, Perek B, Jemielity M. Neutrophil Counts, Neutrophil-to-Lymphocyte  
216 Ratio, and Systemic Inflammatory Response Index (SIRI) Predict Mortality after Off-

- 217 Pump Coronary Artery Bypass Surgery. *Cells*. 2022 Mar 26;11(7):1124. doi:  
218 10.3390/cells11071124. PMID: 35406687; PMCID: PMC8997598.
- 219 8) Peng Y, Huang W, Shi Z, Chen Y, Ma J. Positive association between systemic immune-  
220 inflammatory index and mortality of cardiogenic shock. *Clin Chim Acta*. 2020  
221 Dec;511:97-103. doi: 10.1016/j.cca.2020.09.022. Epub 2020 Oct 9. PMID: 33045194.
- 222 9) Luo H, He L, Zhang G, Yu J, Chen Y, Yin H, Goyal H, Zhang GM, Xiao Y, Gu C, Yin  
223 M, Jiang X, Song X, Zhang L. Normal Reference Intervals of Neutrophil-To-Lymphocyte  
224 Ratio, Platelet-To-Lymphocyte Ratio, Lymphocyte-To-Monocyte Ratio, and Systemic  
225 Immune Inflammation Index in Healthy Adults: a Large Multi-Center Study from Western  
226 China. *Clin Lab*. 2019 Mar 1;65(3). doi: 10.7754/Clin.Lab.2018.180715. PMID:  
227 30868857.
- 228 10) Lin KB, Fan FH, Cai MQ, Yu Y, Fu CL, Ding LY, Sun YD, Sun JW, Shi YW, Dong ZF,  
229 Yuan MJ, Li S, Wang YP, Chen KK, Zhu JN, Guo XW, Zhang X, Zhao YW, Li JB,  
230 Huang D. Systemic immune inflammation index and system inflammation response index  
231 are potential biomarkers of atrial fibrillation among the patients presenting with ischemic  
232 stroke. *Eur J Med Res*. 2022 Jul 2;27(1):106. doi: 10.1186/s40001-022-00733-9. PMID:  
233 35780134; PMCID: PMC9250264.
- 234 11) Torsten Doenst, Michael A. Borger, Richard D. Weisel, Terrence M. Yau, Manjula  
235 Maganti, Vivek Rao, Relation between aortic cross-clamp time and mortality — not as  
236 straightforward as expected, *European Journal of Cardio-Thoracic Surgery*, Volume 33,  
237 Issue 4, April 2008, Pages 660–665, <https://doi.org/10.1016/j.ejcts.2008.01.001>
- 238 12) Argyris Michalopoulos, George Tzelepis, Urania Dafni, Stefanos Geroulanos,  
239 Determinants of Hospital Mortality After Coronary Artery Bypass Grafting, *Chest*,  
240 Volume 115, Issue 6, 1999, Pages 1598-1603, ISSN 0012-3692,  
241 <https://doi.org/10.1378/chest.115.6.1598>.

- 242 13) Jeffrey P. Schwartz, Mamdouh Bakhos, Amit Patel, Sally Botkin, Siyamek Neragi-  
243 Miandoab, Repair of aortic arch and the impact of cross-clamping time, New York Heart  
244 Association stage, circulatory arrest time, and age on operative outcome, *Interactive*  
245 *CardioVascular and Thoracic Surgery*, Volume 7, Issue 3, June 2008, Pages 425–  
246 429, <https://doi.org/10.1510/icvts.2007.164871>
- 247 14) Urbanowicz TK, Michalak M, Gąsecka A, Olasińska-Wiśniewska A, Perek B, Rodzki M,  
248 Bociański M, Jemielity M. A Risk Score for Predicting Long-Term Mortality Following  
249 Off-Pump Coronary Artery Bypass Grafting. *J Clin Med*. 2021 Jul 7;10(14):3032. doi:  
250 10.3390/jcm10143032. PMID: 34300198; PMCID: PMC8305554.
- 251 15) Hajibandeh S, Hajibandeh S, Hobbs N, Mansour M. Neutrophil-to-lymphocyte ratio  
252 predicts acute appendicitis and distinguishes between complicated and uncomplicated  
253 appendicitis: A systematic review and meta-analysis. *Am J Surg*. 2020 Jan;219(1):154-  
254 163. doi: 10.1016/j.amjsurg.2019.04.018. Epub 2019 Apr 27. PMID: 31056211.
- 255 16) Aydın C, Engin M. The Value of Inflammation Indexes in Predicting Patency of  
256 Saphenous Vein Grafts in Patients With Coronary Artery Bypass Graft Surgery. *Cureus*.  
257 2021 Jul 26;13(7):e16646. doi: 10.7759/cureus.16646. PMID: 34462681; PMCID:  
258 PMC8387011.
- 259 17) Li W, Ma G, Deng Y, Chen W, Liu Z, Chen F, Wu Q. Systemic Immune-Inflammation  
260 Index Is a Prognostic Factor for Breast Cancer Patients After Curative Resection. *Front*  
261 *Oncol*. 2021 Dec 1;11:570208. doi: 10.3389/fonc.2021.570208. PMID: 34926234;  
262 PMCID: PMC8671143.
- 263 18) Balk RA. Systemic inflammatory response syndrome (SIRS): where did it come from and  
264 is it still relevant today? *Virulence*. 2014 Jan 1;5(1):20-6. doi: 10.4161/viru.27135. Epub  
265 2013 Nov 13. PMID: 24280933; PMCID: PMC3916374.

- 266 19) Day JR, Taylor KM. The systemic inflammatory response syndrome and cardiopulmonary  
267 bypass. *Int J Surg*. 2005;3(2):129-40. doi: 10.1016/j.ijssu.2005.04.002. Epub 2005 Aug 1.  
268 PMID: 17462274.
- 269 20) Urbanowicz T, Michalak M, Olasińska-Wisniewska A, Rodzki M, Witkowska A, Gąsecka  
270 A, Buczkowski P, Perek B, Jemielity M. Neutrophil Counts, Neutrophil-to-Lymphocyte  
271 Ratio, and Systemic Inflammatory Response Index (SIRI) Predict Mortality after Off-  
272 Pump Coronary Artery Bypass Surgery. *Cells*. 2022 Mar 26;11(7):1124. doi:  
273 10.3390/cells11071124. PMID: 35406687; PMCID: PMC8997598.
- 274 21) Salis S, Mazzanti VV, Merli G, Salvi L, Tedesco CC, Veglia F and Sisillo  
275 E. Cardiopulmonary Bypass Duration Is an Independent Predictor of Morbidity and  
276 Mortality After Cardiac Surgery. *Journal of Cardiothoracic and Vascular Anesthesia*.  
277 2008;22:814–822.
- 278 22) Schmid FX, Vudattu N, Floerchinger B, Hilker M, Eissner G, Hoenicka M, Holler E and  
279 Birnbaum DE. Endothelial apoptosis and circulating endothelial cells after bypass grafting  
280 with and without cardiopulmonary bypass. *Eur J Cardiothorac Surg*. 2006;29:496–500.
- 281 23) Verrier ED and Morgan EN. Endothelial response to cardiopulmonary bypass  
282 surgery. *Ann Thorac Surg*. 1998;66:S17–9; discussion S25–8.
- 283 24) Weerasinghe A and Taylor KM. The platelet in cardiopulmonary bypass. *Ann Thorac*  
284 *Surg*. 1998;66:2145–52.
- 285 25) Iino K, Miyata H, Motomura N, Watanabe G, Tomita S, Takemura H, Takamoto S.  
286 Prolonged Cross-Clamping During Aortic Valve Replacement Is an Independent Predictor  
287 of Postoperative Morbidity and Mortality: Analysis of the Japan Cardiovascular Surgery  
288 Database. *Ann Thorac Surg*. 2017 Feb;103(2):602-609. doi:  
289 10.1016/j.athoracsur.2016.06.060. Epub 2016 Sep 10. PMID: 27624296.

290 26) Robich M, Ryzhov S, Kacer D, Palmeri M, Peterson SM, Quinn RD, Carter D, Sheppard  
291 F, Hayes T, Sawyer DB, Rappold J, Prudovsky I, Kramer RS. Prolonged  
292 Cardiopulmonary Bypass is Associated With Endothelial Glycocalyx Degradation. *J Surg*  
293 *Res.* 2020 Jul;251:287-295. doi: 10.1016/j.jss.2020.02.011. Epub 2020 Apr 30. PMID:  
294 32199337; PMCID: PMC7247933.

295 27) Aouifi A, Piriou V, Blanc P, Bouvier H, Bastien O, Chiari P, Rousson R, Evans R, Lehot  
296 JJ. Effect of cardiopulmonary bypass on serum procalcitonin and C-reactive protein  
297 concentrations. *Br J Anaesth.* 1999 Oct;83(4):602-7. doi: 10.1093/bja/83.4.602. PMID:  
298 10673877.

299 28) Berbel-Franco D, Lopez-Delgado JC, Putzu A, Esteve F, Torrado H, Farrero E,  
300 Rodríguez-Castro D, Carrio ML, Landoni G. The influence of postoperative albumin  
301 levels on the outcome of cardiac surgery. *J Cardiothorac Surg.* 2020 May 11;15(1):78.  
302 doi: 10.1186/s13019-020-01133-y. PMID: 32393356; PMCID: PMC7216430.

303 29) Eckart A, Struja T, Kutz A, Baumgartner A, Baumgartner T, Zurfluh S, Neeser O, Huber  
304 A, Stanga Z, Mueller B, Schuetz P. Relationship of Nutritional Status, Inflammation, and  
305 Serum Albumin Levels During Acute Illness: A Prospective Study. *Am J Med.* 2020  
306 Jun;133(6):713-722.e7. doi: 10.1016/j.amjmed.2019.10.031. Epub 2019 Nov 18. PMID:  
307 31751531.

308

309

310

311

312

313

314

315

316

317

318

319

320

321

**Table 1: Demographic and operative data of patients**

| Variables             | Group I (n=54) | Group II (n=42) | p        |
|-----------------------|----------------|-----------------|----------|
| Gender (Male)         | 35 (64,8%)     | 31 (73,8%)      |          |
| Age                   | 63,6±8,8       | 66±8,9          | 0,189    |
| BMI                   | 28,3±4,1       | 27,9±3,5        | 0,677    |
| BSA (m <sup>2</sup> ) | 1,84±0,17      | 1,88±0,14       | 0,156    |
| EF (%)                | 48,8±5,6       | 48,0±6,3        | 0,499    |
| Euroscore II          | 7,9±4,6        | 8,6±4,2         | 0,454    |
| CPB (min)             | 103,8±20       | 134,4±21,3      | <0,001** |
| ACC (min)             | 51,7±10,7      | 89,9±13,0       | <0,001** |

*BMI: Body Mass Index, BSA: Body Surface Area, EF: Ejection fraction, CPB: Cardiopulmonary Bypass, ACC: Aortic Cross Clamp, \*\*p<0.001*

322

323  
324  
325  
326  
327  
328  
329  
330

**Table 2: Preoperative and Postoperative Laboratory Parameters**

|                      |                       | Group          |                 | <i>p</i>                    |
|----------------------|-----------------------|----------------|-----------------|-----------------------------|
|                      |                       | Group I (n=54) | Group II (n=42) |                             |
| <b>SII</b>           |                       |                |                 |                             |
| <b>Preoperative</b>  | <i>Mean±SD</i>        | 890,8±680,2    | 721,7±417,5     | <sup>d</sup> <b>0,404</b>   |
| <b>Postoperative</b> | <i>Mean±SD</i>        | 2847,3±1626,6  | 2590,3±1354,1   | <sup>d</sup> <b>0,07</b>    |
|                      | <sup>e</sup> <i>p</i> | <b>0,001**</b> | <b>0,001**</b>  |                             |
| <b>SIRI</b>          |                       |                |                 |                             |
| <b>Preoperative</b>  | <i>Mean±SD</i>        | 2,2±1,5        | 1,9±1,3         | <sup>d</sup> <b>0,520</b>   |
| <b>Postoperative</b> | <i>Mean±SD</i>        | 15,8±9,4       | 17,2±9,8        | <sup>d</sup> <b>0,398</b>   |
|                      | <sup>e</sup> <i>p</i> | <b>0,001**</b> | <b>0,001**</b>  |                             |
| <b>Albümin</b>       |                       |                |                 |                             |
| <b>Preoperative</b>  | <i>Mean±SD</i>        | 4,1±0,4        | 4,2±0,4         | <sup>b</sup> <b>0,224</b>   |
| <b>Postoperative</b> | <i>Mean±SD</i>        | 3,5±0,3        | 3,4±0,4         | <sup>d</sup> <b>0,311</b>   |
|                      | <sup>e</sup> <i>p</i> | <b>0,001**</b> | <b>0,001**</b>  |                             |
| <b>CRP</b>           |                       |                |                 |                             |
| <b>Preoperative</b>  | <i>Mean±SD</i>        | 2,2±2,3        | 3,0±1,2         | <sup>d</sup> <b>0,001**</b> |
| <b>Postoperative</b> | <i>Mean±SD</i>        | 9,2±2,8        | 8,0±3,9         | <sup>b</sup> <b>0,104</b>   |
|                      | <sup>e</sup> <i>p</i> | <b>0,001**</b> | <b>0,001**</b>  |                             |

*SII*; systemic immun inflammation index, *SIRI*; systemic immun response index, *CRP*; C-reactive protein, <sup>b</sup>Student-t Test, <sup>d</sup>Mann-Whitney-U Test, <sup>e</sup>Paired Samples t-Test, \*\**p*<0,001

331  
332  
333  
334  
335  
336

337  
338  
339  
340  
341

**Table 3: Correlation between variables**

| Variables            |   | Postoperative | Postoperative | Postoperative | Postoperative |
|----------------------|---|---------------|---------------|---------------|---------------|
|                      |   | SIII          | SIRI          | Albumin       | CRP           |
| <b>CPB</b>           | r | 0,001         | 0,052         | -0,174        | -0,098        |
|                      | p | 0,990         | 0,613         | 0,09          | 0,342         |
| <b>ACC</b>           | r | -0,007        | 0,154         | -0,131        | -0,138        |
|                      | p | 0,947         | 0,134         | 0,203         | 0,181         |
| <b>Postoperative</b> | r | 0,240         | 0,160         | -             | -0,028        |
| <b>Albumin</b>       | p | 0,019*        | 0,118         | -             | 0,783         |
| <b>Postoperative</b> | r | -0,078        | -0,045        | -0,028        | -             |
| <b>CRP</b>           | p | 0,452         | 0,662         | 0,783         | -             |

*CPB;Cardiopulmonary bypass, ACC;Aortic cross clamp, CRP;C-reactive protein, SIII;systemic immun inflammation index, SIRI;systemic immun response index*

342  
343  
344  
345  
346

**Figure 1: SIII change according to groups**



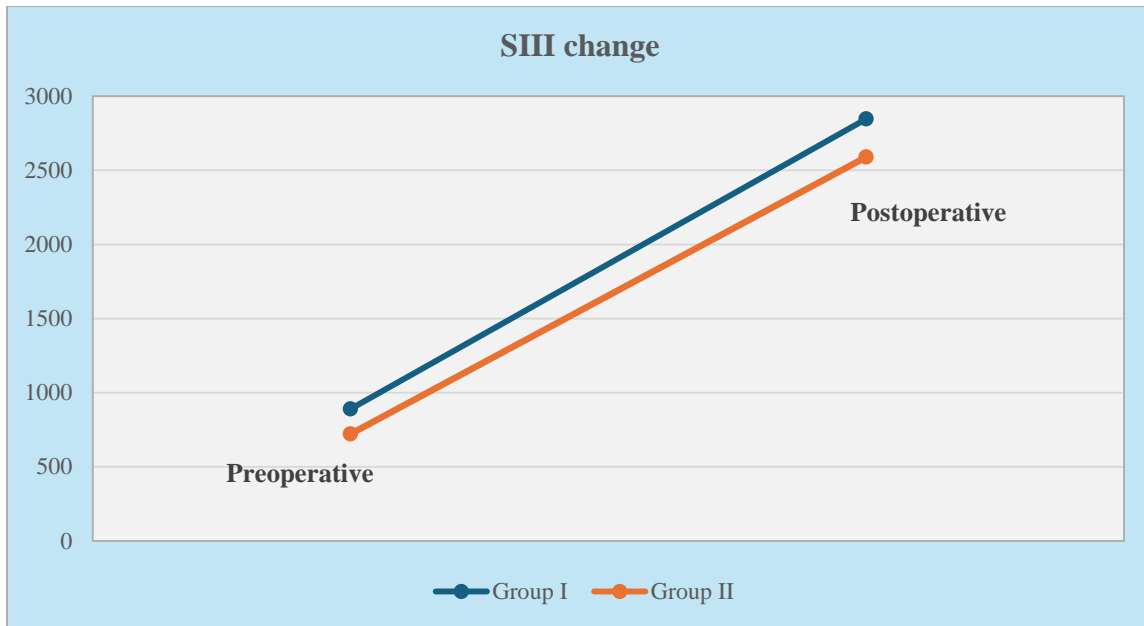

347  
348  
349  
350  
351  
352

**Figure 2: SIII change according to groups**

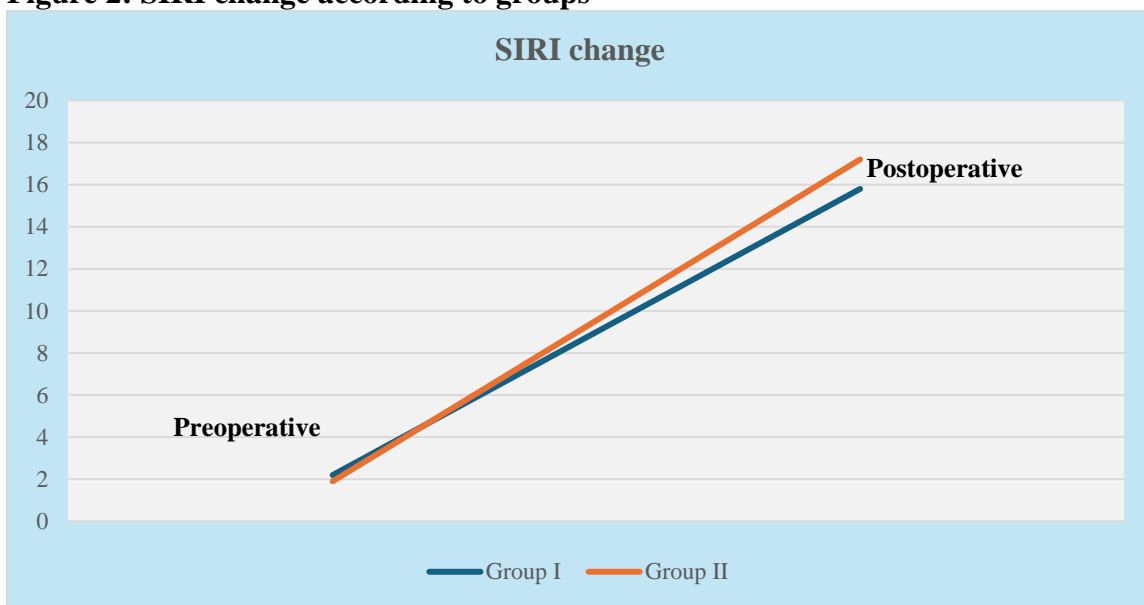

353  
354  
355  
356  
357  
358  
359
